# Supplementary material
Source: Springer Nature journal article supplement (https://www.springermedizin.de/resource/supplementary/12990_2009_234_MOESM1_ESM.pdf/9612850)

## A. Thalamic nociceptive units

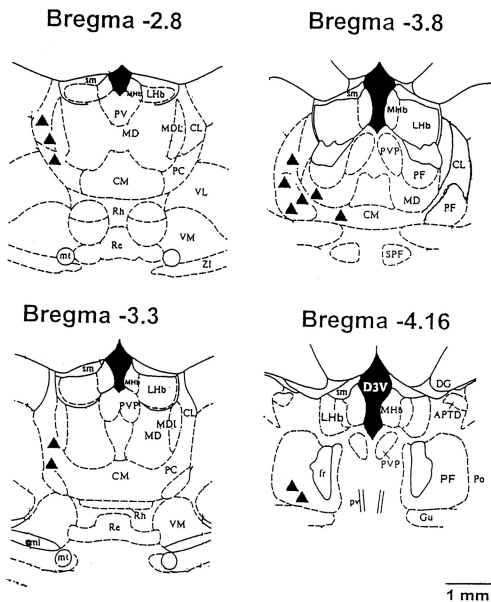

## B. Mechanical nociceptive responses

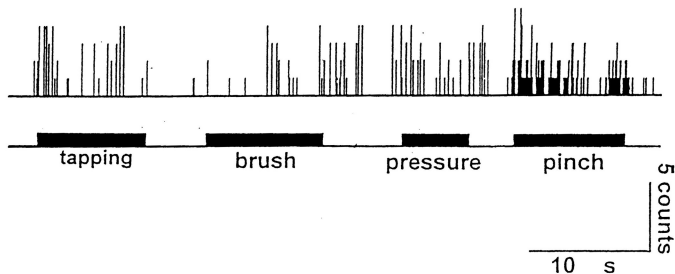

## C. Electrical nociceptive response

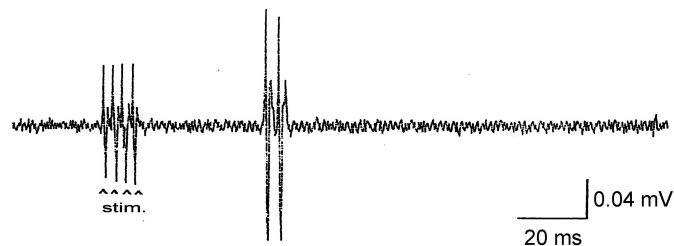

## D. ACC nociceptive units

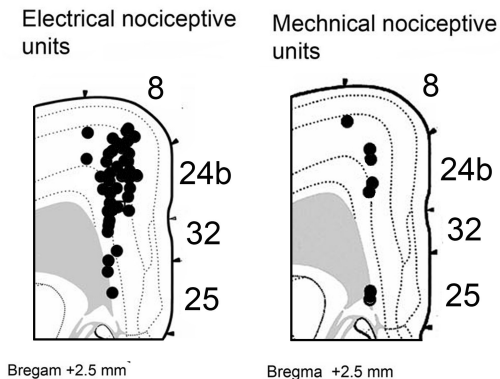

## E. Electrical nociceptive response

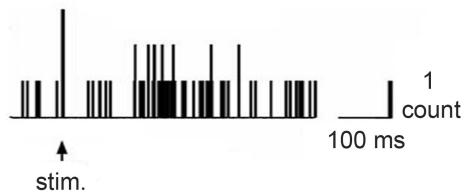

## F. Mechanical nociceptive responses

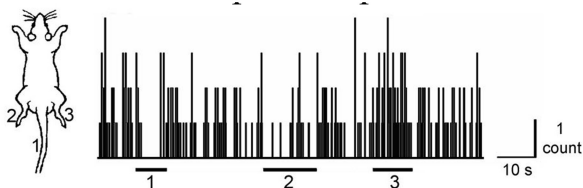

Supplement: MOESM1 [file 9612850]
